# Supplementary material for: Predicting Kinase Activity in Angiotensin Receptor Phosphoproteomes Based on Sequence-Motifs and Interactions
Source: PubMed Central journal article supplement (PMC3983226; doi:10.1371/journal.pone.0094672), 2014-04-10

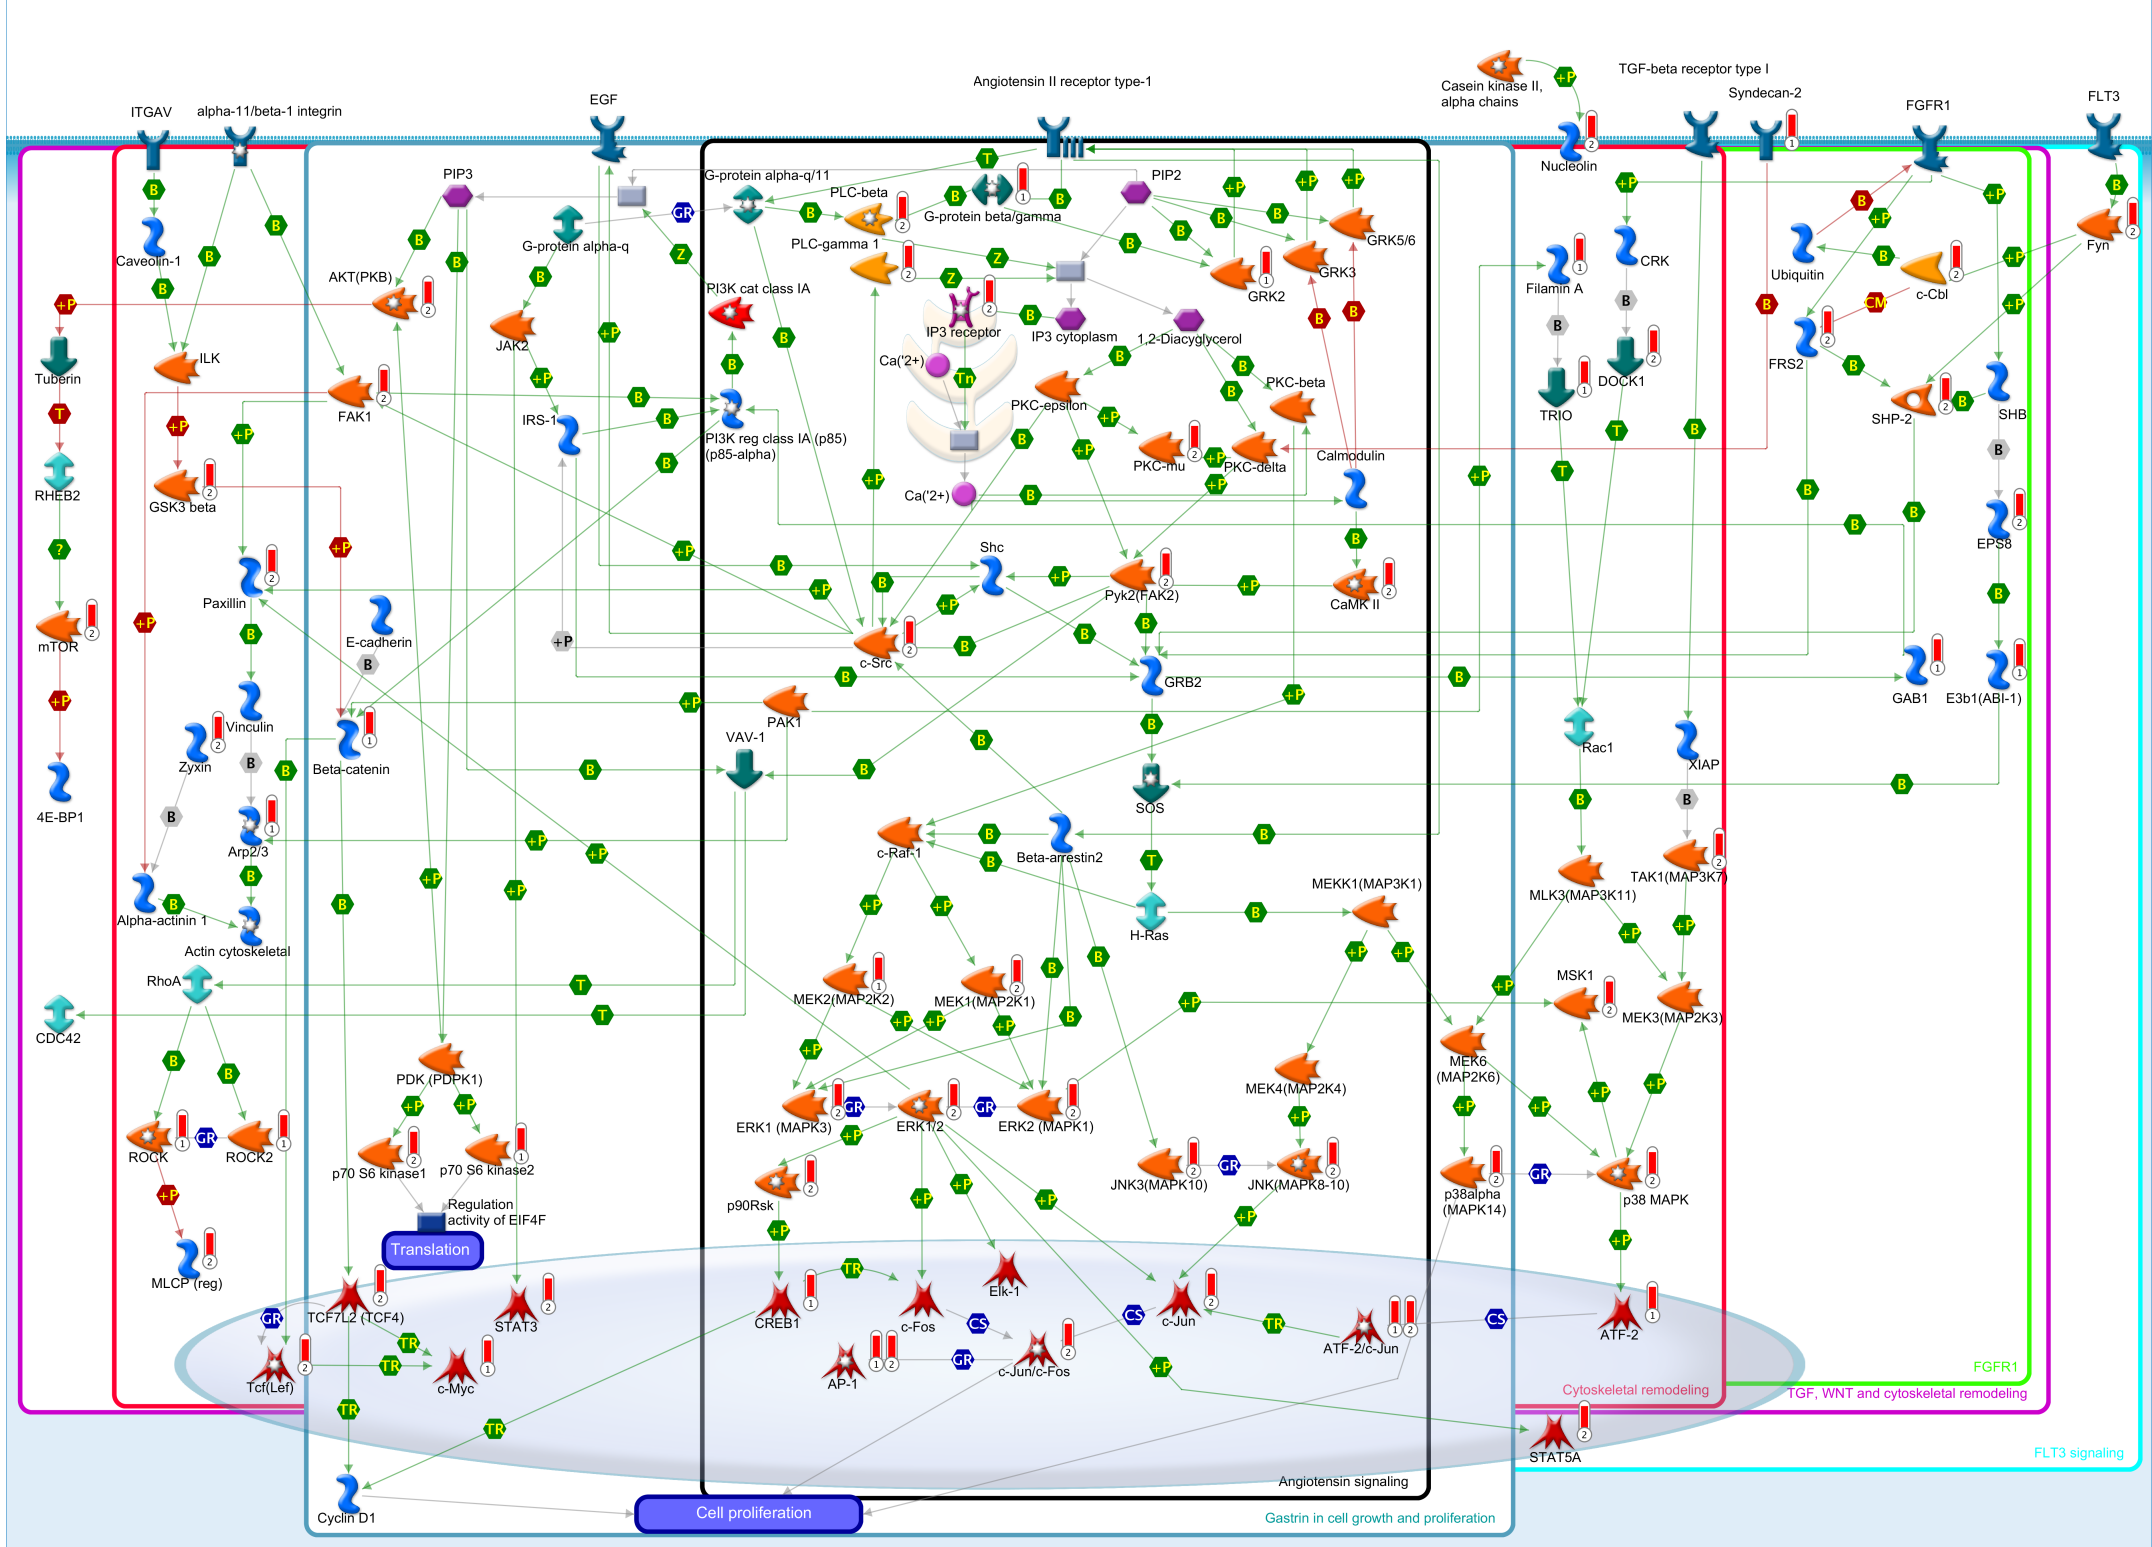

Supplement: pone.0094672.s002.pdf [file pone.0094672.s002.pdf]
